# Supplementary material
Source: PubMed Central journal article supplement (PMC4529618)
Supplement: ajcr0005-1988-f7.pdf [file ajcr0005-1988-f7.pdf]

## Antithetical RARRES3 and MTDH regulation in CRC

**Supplementary Table 1.** shRNA sequences of RARRES3

| shRNA target    | Sequences from 5' to 3'   |
|-----------------|---------------------------|
| shRNA-RARRES3-1 | TCCTGAGCAACAGTGCAGAGGTGAA |
| shRNA-RARRES3-2 | AGGAGATGGTTGGTCAGAAGATGAA |
| shRNA-RARRES3-3 | GGGTCAACAACAGCTTGGACCATGA |
| shRNA-Scarmble  | ATCGACAAGACTGCTAACCACTCGA |
